# Supplementary material for: A Mega-Analysis of the Relationship Between Breath Counting Test Performance and Subscales of the Five Facet Mindfulness Questionnaire
Source: Springer Nature journal article supplement (doi:10.1007/s12671-023-02201-9), 2023-08-25
Supplement: MOESM1 [file 25966642]

| Table S1  *Group Means and Standard Deviations for FFMQ Measures* | | | | | | | |
| --- | --- | --- | --- | --- | --- | --- | --- |
|  |  | **FFMQ Measure** | | | | | |
| **Group** | ***n*** | **Total** | **Observing** | **Describing** | **Awareness** | **Nonjudging** | **Nonreacting** |
| 1 | 108 | 130 (16.6) | 26.6 (5.48) | 28.1 (5.70) | 27.8 (5.46) | 24.8 (5.59) | 22.5 (4.32) |
| 2 | 37 | 125 (12.3) | 24.6 (4.39) | 25.2 (4.61) | 26.5 (4.81) | 26.4 (4.96) | 22.1 (3.87) |
| 3 | 118 | 116 (18.6) | 23.9 (5.35) | 25.4 (5.75) | 23.8 (6.44) | 23.6 (7.41) | 19.7 (4.60) |
| 4 | 52 | 122 (13.7) | 25.8 (4.76) | 25.7 (5.77) | 25.1 (4.96) | 24.1 (5.44) | 21.5 (3.38) |
| 5 | 35 | 121 (13.3) | 25.1 (4.86) | 24.8 (5.75) | 24.7 (5.54) | 24.6 (5.82) | 21.7 (2.62) |
| 6 | N.A. | N.A. | N.A. | N.A. | N.A. | N.A. | N.A. |
| All | 350 | 123 (17.1) | 25.2 (5.26) | 26.1 (5.75) | 25.6 (5.92) | 24.4 (6.23) | 21.3 (4.26) |
|  |  |  |  |  |  |  |  |

| Table S2  *Summary of 0% BCT Reset Ratesa, 0% BCT Miscount Rates and 100% BCT Accuracy.* | | | | | | | | | | |
| --- | --- | --- | --- | --- | --- | --- | --- | --- | --- | --- |
| **Group** | ***n*** |  | **0% Reset Rates (*n*)** | **0% Reset Rates (%)** |  | **0% Miscount Rates (*n*)** | **0% Miscount Rates (%)** |  | **100% Accuracy (*n*)** | **100% Accuracy (%)** |
| 1 | 108 |  | 68 | 63 |  | 6 | 5.6 |  | 3 | 2.8 |
| 2 | 37 |  | 9 | 24.3 |  | 5 | 13.5 |  | 2 | 5.4 |
| 3 | 118 |  | 32 | 27.1 |  | 9 | 7.6 |  | 4 | 3.4 |
| 4 | 52 |  | 13 | 25 |  | 4 | 7.7 |  | 0 | 0 |
| 5 | 35 |  | 11 | 31.4 |  | 8 | 22.9 |  | 3 | 8.6 |
| 6 | 80 |  | 20 | 25 |  | 3 | 3.8 |  | 0 | 0 |
| All | 430 |  | 153 | 35.6 |  | 35 | 8.1 |  | 11 | 2.6 |
| aWe had considered zero-inflated models for reset rate data, but these (in general) work from the assumption that the observations are being driven by qualitatively different processes. We felt that such an assumption was excessive for the present data and was not supported by existing research or common sense (for example, a zero-inflated negative binomial model of reset rates would produce good fit but also imply two qualitatively distinct types of subject – one whose reset rates follow a sampling distribution and contributes “false” zeros, and one who never produces resets due to structural reasons and contributes “true” zeros). | | | | | | | | | | |

| Table S3  *Group Means and Standard Deviations for Z-Transformed FFMQ-Acting with Awareness Scores for Groups 1-5 and z-Transformed MAAS Scores for Group 6* | | | | | |
| --- | --- | --- | --- | --- | --- |
|  |  |  | **z-Transformed Score** | **Original Scores** | |
| **Group** | ***n*** |  | **FFMQ-Acting with Awareness** | **MAAS** |
| 1 | 108 |  | 0.404 (0.908) | 27.8 (5.46) | N.A. |
| 2 | 37 |  | 0.174 (0.799) | 26.5 (4.81) | N.A. |
| 3 | 118 |  | -0.288 (1.070) | 23.7 (6.44) | N.A. |
| 4 | 52 |  | -0.0522 (0.824) | 25.1 (4.96) | N.A. |
| 5 | 35 |  | -0.116 (0.921) | 24.7 (5.54) | N.A. |
| 6 | 80 |  | -0.0376 (1.038) | N.A. | 55.9 (10.8) |
| All | 430 |  | 0.0255 (0.997) | - | - |
|  |  |  |  | | |


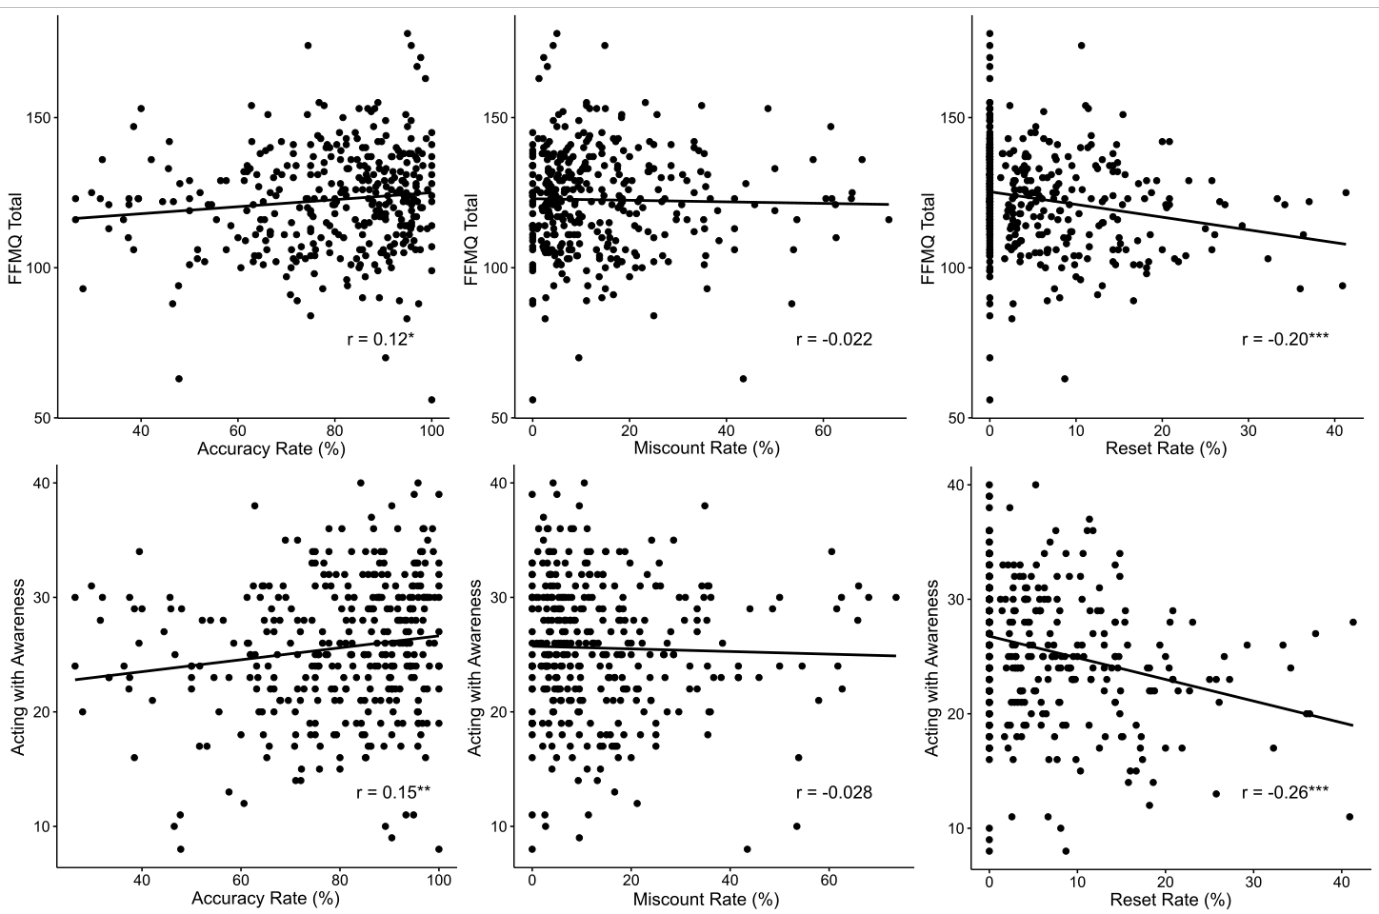


**Figure S1.** Zero-order correlations between breath-counting performance (left column: accuracy rate; middle column: miscount rate; right column: reset rate) and selected indicators of self-reported trait mindfulness (top row: total FFMQ score; bottom row: Acting with Awareness sub-score). **p* < 0.05, ***p* < 0.01, ****p* < 0.001


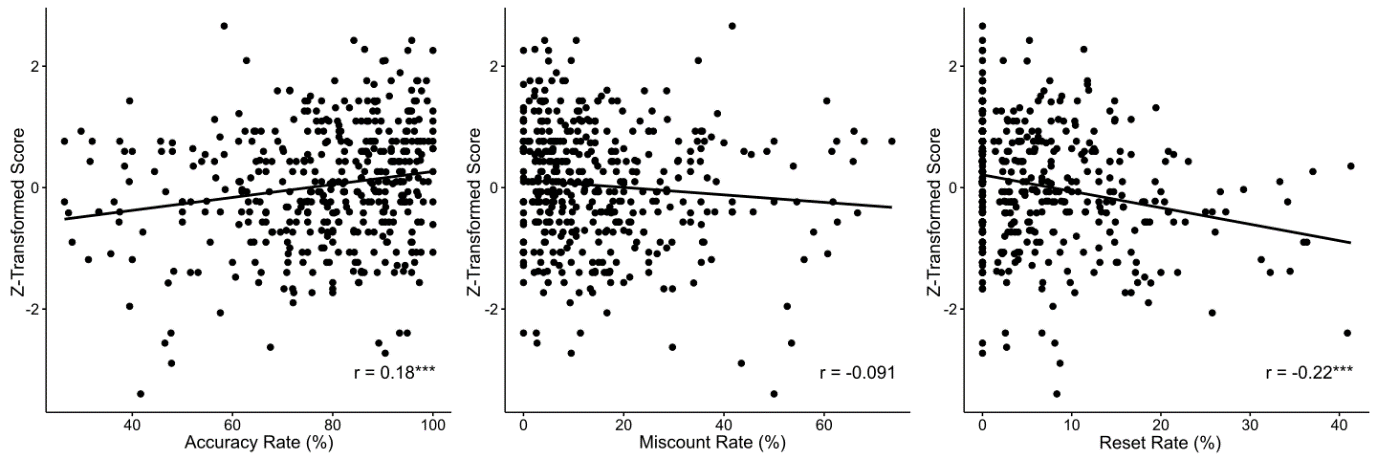


**Figure S2.** Zero-order correlations between breath-counting performance (left column: accuracy rate; middle column: miscount rate; right column: reset rate) and z-transformed scores. The z-transformed scores are a combination of z-transformed Acting with Awareness sub-scores from Groups 1-5 and z-transformed MAAS scores from Group 6. ****p* < 0.001
